# Supplementary material for: Intracellular microRNA profiles form in the Xenopus laevis oocyte that may contribute to asymmetric cell division
Source: PubMed Central journal article supplement (PMC4461913; doi:10.1038/srep11157), 2015-06-10
Supplement: srep11157-s1.pdf [file srep11157-s1.pdf]

# Intracellular microRNA profiles form in the *Xenopus laevis* oocyte that may contribute to asymmetric cell division

Authors

Monika Sidova, Radek Sindelka, Mirco Castoldi, Vladimir Benes and Mikael Kubista

## Supplement information

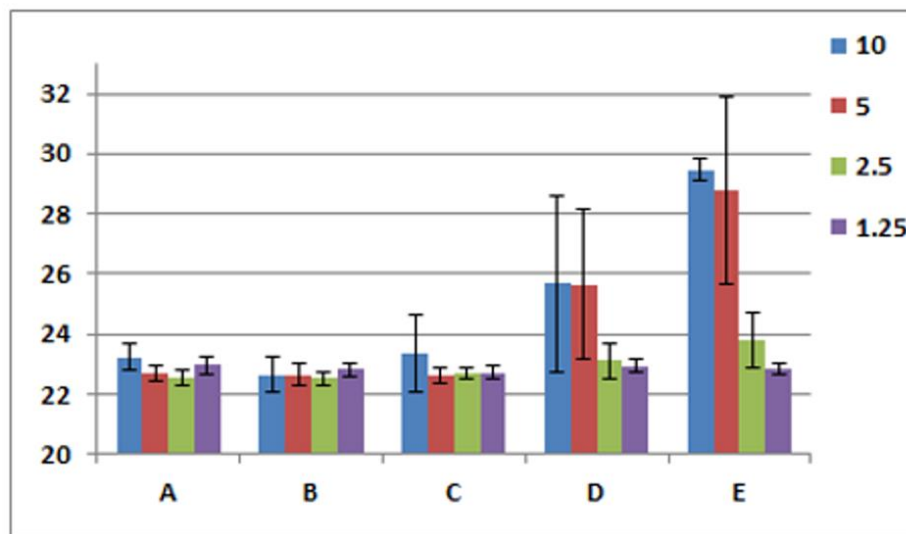

Supplement Figure 1. Optimization of experimental protocol using an RNA spike. 10 ng (blue), 5 ng (red), 2.5 ng (green), and 1.25 ng (violet) of total RNA and same amount of the RNA spike were used for reverse transcription. Spike cDNA was then quantified using qPCR. Y-axis shows Cq value and x-axis indicates section from the animal pole (section A) to vegetal pole (section E). Error bars indicate standard deviation of biological replicates.

| miRNA       | primer                   | Tm    |
|-------------|--------------------------|-------|
| miR-16c     | TAGCAGCACGTAAATACTGGAGG  | 59.30 |
| miR-18b     | TAAGGTGCATCTAGTGCAGTTAGG | 59.52 |
| miR-19b     | TGCAAATCCATGCAAACTGAG    | 61.83 |
| miR-20b     | CAAAGTGCTCATAGTGCAGGTAGG | 60.98 |
| miR-22      | AGCTGCCAGTTGAAGAACTGTG   | 60.44 |
| miR-25      | ATTGCACTTGTCTCGGTCTGAG   | 60.27 |
| miR-93a     | GTGCTGTTTCGTGCAGGTAGG    | 60.29 |
| miR-100     | CCGTAGATCCGAACTTGTGG     | 58.99 |
| miR-148b    | TCAGTGCATCACAGAACTTTGTG  | 59.79 |
| miR-221     | GCTACATTGTCTGCTGGGTTTG   | 60.50 |
| miR-363-3p  | AATTGCACGGTATCCATCTGTAAG | 60.08 |
| miR-5102-5p | GAGTTTGA CTGGGGCGG       | 58.52 |
| miR-15a     | TAGCAGCACATAATGGTTTGTGAG | 60.02 |
| miR-15c     | TAGCAGCACATCATGGTTTGTAG  | 58.77 |
| miR-22      | AGCTGCCAGTTGAAGAACTGTG   | 60.44 |
| miR-24a     | GCTCAGTTCAGCAGGAACAGG    | 60.93 |
| miR-27b     | TCACAGTGGCTAAGTTCTGCG    | 60.03 |
| miR-34a     | GGCAGTGTCTTAGCTGGTTGTG   | 60.69 |
| miR-34b     | AGGCAGTGTAGTTAGCTGATTGG  | 58.47 |
| miR-122     | TGGAGTGTGACAATGGTGTGTTG  | 60.28 |
| miR-124     | ACGCGGTGAATGCCAAG        | 60.20 |
| miR-140-3p  | CACAGGGTAGAACCACGGAG     | 59.00 |
| miR-191     | GAATCCCAAAGCAGCTGTG      | 59.26 |
| miR-210     | CGTGTGACAGCGGCTGAG       | 61.23 |
| miR-214     | CAGGCACAGACAGGCAGTG      | 60.03 |
| miR-222     | ACATCTGGCTACTGGGTCTCG    | 60.11 |
| miR-375     | CGTTCGGCTCGCGTTAG        | 60.08 |

Supplement Table 1. Primer assays and their predicted Tm of maternal miRNAs. The primer assays were designed for 27 randomly selected maternal miRNAs. 12 assays (miR-16c, miR-18b, miR-19b, miR-20b, miR-22, miR-25, miR-93a, miR-100, miR-148b, miR-221, miR-363-3p, miR-5102-5p, shown in red) showed higher and more reproducible expression than the other 15 miRNAs (miR-15a, miR-15c, miR-22, miR-24a, miR-27b, miR-34a, miR-34b, miR-122, miR-124, miR-140-3p, miR-191, miR-210, miR-214, miR-222, miR-375, shown in blue).
